# Supplementary material
Source: PubMed Central journal article supplement (PMC4788030)
Supplement: hobf840322.ww1_default.pdf [file hobf840322.ww1_default.pdf]

**Appendix: Supplementary tables [posted as supplied by author]**

**Table A: Risk of ischaemic stroke in BAFTA participants taking Aspirin at baseline, by risk strata and scheme**

| Risk scheme                 | Events /person years, Risk/100 person years (95%CI) |                               |                               |
|-----------------------------|-----------------------------------------------------|-------------------------------|-------------------------------|
|                             | Low risk                                            | Moderate risk                 | High risk                     |
| CHADS <sub>2</sub> original |                                                     | 23/679<br>3.39 (2.15 to 5.08) | 11/272<br>4.04 (2.02 to 7.24) |
| CHADS <sub>2</sub> revised  |                                                     | 4/298<br>1.34 (0.36 to 3.44)  | 30/653<br>4.59 (3.10 to 6.56) |
| Framingham                  | 0/160                                               | 19/378<br>5.03 (3.03 to 7.85) | 15/413<br>3.63 (2.03 to 5.99) |
| NICE                        |                                                     | 4/244<br>1.64 (0.45 to 4.20)  | 30/707<br>4.24 (2.86 to 6.06) |
| ACC/AHA/ESC                 |                                                     | 4/298<br>1.34 (0.36 to 3.44)  | 30/653<br>4.59 (3.10 to 6.56) |
| ACCP                        | 0/33                                                | 6/304<br>1.97 (0.72 to 4.30)  | 28/613<br>4.57 (3.04 to 6.60) |

Using CHA<sub>2</sub>DS<sub>2</sub>-VAsC, all patients would be classified as 'high risk'.

**Table B: Risk of ischaemic stroke, systemic embolism or transient ischaemic attack in BAFTA participants, by risk strata and scheme**

| Risk scheme                    | Events /person years, Risk/100 person years (95%CI) |                                |                                |                                                    |                                |                                |
|--------------------------------|-----------------------------------------------------|--------------------------------|--------------------------------|----------------------------------------------------|--------------------------------|--------------------------------|
|                                | Event = ischaemic stroke or systemic embolism       |                                |                                | Event = ischaemic stroke, systemic embolism or TIA |                                |                                |
|                                | Low risk                                            | Moderate risk                  | High risk                      | Low risk                                           | Moderate risk                  | High risk                      |
| CHADS <sub>2</sub><br>original |                                                     | 36/1113<br>3.23 (2.27 to 4.48) | 22/402<br>5.47 (3.43 to 8.29)  |                                                    | 44/1105<br>3.98 (2.89 to 5.35) | 24/399<br>6.02 (3.85 to 8.95)  |
| CHADS <sub>2</sub><br>revised  |                                                     | 7/505<br>1.39 (0.56 to 2.86)   | 51/1010<br>5.05 (3.76 to 6.64) |                                                    | 7/505<br>1.39 (0.56 to 2.86)   | 61/999<br>6.11 (4.67 to 7.84)  |
| Framingham                     | 2/263<br>0.76 (0.09 to 2.75)                        | 26/625<br>4.16 (2.72 to 6.10)  | 30/627<br>4.78 (3.23 to 6.83)  | 3/263<br>1.14 (0.24 to 3.33)                       | 32/618<br>5.18 (3.54 to 7.31)  | 33/623<br>5.30 (3.65 to 7.44)  |
| NICE                           |                                                     | 6/415<br>1.45 (0.53 to 3.15)   | 52/1100<br>4.73 (3.53 to 6.20) |                                                    | 6/415<br>1.45 (0.53 to 3.15)   | 62/1089<br>5.69 (4.37 to 7.30) |
| ACC/AHA/ES<br>C                |                                                     | 7/505<br>1.39 (0.56 to 2.86)   | 51/1010<br>5.05 (3.76 to 6.64) |                                                    | 7/505<br>1.39 (0.56 to 2.86)   | 61/999<br>6.11 (4.67 to 7.84)  |
| ACCP                           | 1/42<br>2.38 (0.06 to 13.3)                         | 9/519<br>1.73 (0.79 to 3.29)   | 48/954<br>5.03 (3.71 to 6.67)  | 1/42<br>2.38 (0.06 to 13.3)                        | 10/518<br>1.93 (0.93 to 3.55)  | 57/ 944<br>6.04 (4.57 to 7.82) |

Using CHA<sub>2</sub>DS<sub>2</sub>-VASc, all patients would be classified as 'high risk'.

**Table C: Performance of risk stratification schemes to predict ischaemic stroke in BAFTA patients on Aspirin at baseline**

| Risk scheme                              | C statistic         | Hazard ratio<br>(95% CI) | P value<br>(Hazard Ratio) |
|------------------------------------------|---------------------|--------------------------|---------------------------|
| <b>Strata</b>                            |                     |                          |                           |
| CHADS <sub>2</sub> original              | 0.50 (0.47 to 0.58) | 1.18 (0.58 to 2.43)      | 0.65                      |
| CHADS <sub>2</sub> revised               | 0.61 (0.55 to 0.65) | 3.42 (1.20 to 9.70)      | 0.02                      |
| Framingham<br>(high vs moderate)         | 0.62 (0.57 to 0.69) | 0.73 (0.37 to 1.44)      | 0.36                      |
| NICE                                     | 0.58 (0.51 to 0.63) | 2.59 (0.91 to 7.38)      | 0.07                      |
| ACC/AHA/ESC                              | 0.61 (0.55 to 0.65) | 3.42 (1.20 to 9.70)      | 0.02                      |
| ACCP<br>(high vs moderate)               | 0.59 (0.53 to 0.67) | 2.33 (0.96 to 5.63)      | 0.06                      |
| <b>Scores</b>                            |                     |                          |                           |
| CHADS <sub>2</sub> Index                 | 0.57 (0.49 to 0.66) | 1.25 (0.93 to 1.67)      | 0.14                      |
| Rietbrock modified<br>CHADS <sub>2</sub> | 0.60 (0.50 to 0.69) | 1.14 (1.01 to 1.29)      | 0.03                      |
| CHA <sub>2</sub> DS <sub>2</sub> -VAsc   | 0.55 (0.46 to 0.64) | 1.09 (0.84 to 1.40)      | 0.52                      |

**Table D: Performance of risk stratification schemes to predict ischaemic stroke, systemic embolism or transient ischaemic attack**

| Risk scheme                              | Event = ischaemic stroke or systemic embolism |                                             |                        | Event = ischaemic stroke, systemic embolism or TIA |                                             |                        |
|------------------------------------------|-----------------------------------------------|---------------------------------------------|------------------------|----------------------------------------------------|---------------------------------------------|------------------------|
|                                          | C statistic (95% CI)                          | Hazard ratio (95% CI)                       | P value (Hazard Ratio) | C statistic (95% CI)                               | Hazard ratio (95% CI)                       | P value (Hazard Ratio) |
| <b>Strata</b>                            |                                               |                                             |                        |                                                    |                                             |                        |
| CHADS <sub>2</sub> original              | 0.55 (0.49 to 0.62)                           | 1.67 (0.99 to 2.84)                         | 0.06                   | 0.54 (0.49 to 0.60)                                | 1.49 (0.91 to 2.45)                         | 0.12                   |
| CHADS <sub>2</sub> revised               | 0.61 (0.57 to 0.65)                           | 3.56 (1.61 to 7.84)                         | 0.002                  | 0.62 (0.59 to 0.65)                                | 4.29 (1.96 to 9.38)                         | <0.001                 |
| Framingham (mod vs low)<br>(high vs mod) | 0.59 (0.55 to 0.66)                           | 5.40 (1.28 to 22.77)<br>1.16 (0.69 to 1.96) | 0.02<br>0.58           | 0.57 (0.54 to 0.63)                                | 4.47 (1.37 to 14.62)<br>1.03 (0.63 to 1.68) | 0.01<br>0.90           |
| NICE                                     | 0.59 (0.55 to 0.62)                           | 3.16 (1.36 to 7.36)                         | 0.008                  | 0.60 (0.56 to 0.63)                                | 3.80 (1.64 to 8.78)                         | 0.002                  |
| ACC/AHA/ESC                              | 0.61 (0.57 to 0.65)                           | 3.56 (1.61 to 7.84)                         | 0.002                  | 0.62 (0.59 to 0.65)                                | 4.29 (1.96 to 9.38)                         | <0.001                 |
| ACCP (mod vs low)<br>(high vs low)       | 0.61 (0.55 to 0.66)                           | 0.74 (0.09 to 5.88)<br>2.84 (1.39 to 5.79)  | 0.78<br>0.004          | 0.62 (0.56 to 0.66)                                | 0.81 (0.35 to 1.88)<br>3.01 (1.56 to 6.00)  | 0.63<br>0.001          |
| <b>Scores</b>                            |                                               |                                             |                        |                                                    |                                             |                        |
| CHADS <sub>2</sub> Index                 | 0.62 (0.55 to 0.68)                           | 1.37 (1.10 to 1.71)                         | 0.005                  | 0.62 (0.56 to 0.68)                                | 1.37 (1.11 to 1.67)                         | 0.003                  |
| Rietbrock modified CHADS <sub>2</sub>    | 0.62 (0.53 to 0.70)                           | 1.17 (1.06 to 1.28)                         | 0.001                  | 0.59 (0.52 to 0.67)                                | 1.14 (1.04 to 1.24)                         | 0.003                  |
| CHA <sub>2</sub> DS <sub>2</sub> -VAsc   | 0.61 (0.53 to 0.68)                           | 1.23 (1.02 to 1.48)                         | 0.029                  | 0.61 (0.54 to 0.67)                                | 1.24 (1.05 to 1.47)                         | 0.013                  |
